# Supplementary material for: Leisure time physical activity and the risk of hip or knee replacement due to primary osteoarthritis: a population based cohort study (The HUNT Study)
Source: PubMed Central journal article supplement (PMC4754866; doi:10.1186/s12891-016-0937-7), 2016-02-16
Supplement: 12891_2016_937_MOESM2_ESM.pdf [file 12891_2016_937_MOESM2_ESM.pdf]

**Additional file 1 Risk of hip replacement (THR) after excluding participants with OA at baseline (n=5244).**

|              | Model 1*                |                         |                         |                  |
|--------------|-------------------------|-------------------------|-------------------------|------------------|
|              | Total population        | <45 years               | 45-59 years             | ≥60 years        |
| LPA          | HR (95%CI)              | HR (95%CI)              | HR (95% CI)             | HR (95% CI)      |
| <b>Women</b> |                         |                         |                         |                  |
| Inactive     | 0.81 (0.55-1.18)        | 0.85 (0.26-2.80)        | 1.05 (0.61-1.83)        | 0.99 (0.55-1.77) |
| Low          | 1                       | 1                       | 1                       | 1                |
| Moderate     | 0.99 (0.81-1.21)        | 1.06 (0.62-1.81)        | 1.04 (0.80-1.34)        | 1.03 (0.71-1.48) |
| High         | 1.11 (0.88-1.41)        | <b>1.84 (1.10-3.08)</b> | 0.96 (0.70-1.33)        | 1.27 (0.78-2.06) |
| p trend      | 0.20                    | <b>0.02</b>             | 0.86                    | 0.44             |
| <b>Men</b>   |                         |                         |                         |                  |
| Inactive     | 1.11 (0.72-1.71)        | 0.75 (0.16-3.54)        | 1.44 (0.81-2.55)        | 0.95 (0.45-2.00) |
| Low          | 1                       | 1                       | 1                       | 1                |
| Moderate     | 1.28 (0.97-1.68)        | 1.54 (0.66-3.60)        | 1.20 (0.81-1.76)        | 1.44 (0.93-2.23) |
| High         | <b>1.45 (1.11-1.90)</b> | 1.77 (0.78-4.02)        | <b>1.68 (1.17-2.40)</b> | 1.11 (0.68-1.81) |
| p trend      | 0.01                    | 0.10                    | <b>0.03</b>             | 0.46             |

LPA= leisure time physical activity

\*Model 1: adjusted for age at baseline, BMI and workload, including participants without OA at baseline and with non-missing values on LPA, n=61 720.
