# Supplementary material for: Leisure time physical activity and the risk of hip or knee replacement due to primary osteoarthritis: a population based cohort study (The HUNT Study)
Source: Springer Nature journal article supplement (doi:10.1186/s12891-016-0937-7), 2016-02-16
Supplement: MOESM3 [file 9753094]

**Additional file 2 Risk of knee replacement (TKR) after excluding participants with OA at baseline (n=5244).**

|              | Model 1*                |                  |                         |                  |
|--------------|-------------------------|------------------|-------------------------|------------------|
|              | Total population        | <45 years        | 45-59 years             | ≥60 years        |
| LPA          | HR (95% CI)             | HR (95%CI)       | HR (95% CI)             | HR (95% CI)      |
| <b>Women</b> |                         |                  |                         |                  |
| Inactive     | 0.59 (0.35-1.02)        | 0 (0)            | 0.75 (0.35-1.63)        | 0.85 (0.39-1.83) |
| Low          | 1                       | 1                | 1                       | 1                |
| Moderate     | <b>0.75 (0.57-0.98)</b> | 0.85 (0.45-1.63) | 0.80 (0.56-1.15)        | 0.70 (0.41-1.17) |
| High         | 1.32 (0.99-1.75)        | 1.40 (0.75-2.63) | <b>1.55 (1.06-2.26)</b> | 1.15 (0.61-2.17) |
| p trend      | 0.05                    | 0.09             | 0.06                    | 0.98             |
| <b>Men</b>   |                         |                  |                         |                  |
| Inactive     | 1.12 (0.69-1.81)        | 0.37 (0.05-2.96) | 1.32 (0.72-2.44)        | 1.34 (0.56-3.21) |
| Low          | 1                       | 1                | 1                       | 1                |
| Moderate     | 1.00 (0.72-1.39)        | 1.23 (0.53-2.85) | 0.94 (0.61-1.47)        | 1.11 (0.60-2.03) |
| High         | 1.03 (0.74-1.44)        | 1.14 (0.49-2.66) | 1.02 (0.66-1.57)        | 1.10 (0.58-2.09) |
| p trend      | 0.92                    | 0.38             | 0.61                    | 0.93             |

LPA= leisure time physical activity

\*Model 1: adjusted for age at baseline, BMI and workload, including participants without OA at baseline and with non-missing values on LPA, n=61 720.
